# Supplementary material for: From grassroots to strategy: advancing laboratory sustainability at Utrecht university
Source: Royal Society of Chemistry journal article supplement (doi:10.1039/d6ra04362c), 2026-06-02
Supplement: d6ra04362c1.pdf [file d6ra04362c1.pdf]

## Supplementary Information

### Supplementary Tables

**Table S1.** Hazardous and non-hazardous waste categories with corresponding Utrecht University classifications and EURAL codes from the European Waste Catalogue (EWC) <sup>73</sup>. For hazardous waste, category V (batteries, polishes) was excluded, as it does not originate from wet labs. It consists of nearly 0.5 % of total hazardous waste produced at Utrecht University (2023).

| Hazardous waste                                | Category   | EURAL code |
|------------------------------------------------|------------|------------|
| Liquid acidic and neutral inorganic substances | Cat. I     | 20 01 14   |
| Liquid alkaline inorganic substances           | Cat. II    | 20 01 15   |
| Liquid halogen-poor organic waste substances   | Cat. III   | 20 01 13   |
| Solid organic halogen-low substances           | Cat. III.2 | 15 02 02   |
| Liquid halogen-rich organic waste substances   | Cat. IV    | 14 06 02   |
| Biological, non-infectious substances (GMO)    | Cat. VI.2a | 18 01 03   |
| Biological, infectious substances (GMO)        | Cat. VI.2c | 18 01 03   |
| Sharp items                                    | -          | 18 01 06   |
| <b>Non-hazardous waste</b>                     |            |            |
| Plastic packaging                              | -          | 15 01 02   |
| Mixed rigid plastics                           | -          | 20 01 39   |
| Paper and carton                               | -          | 20 01 01   |
| Expanded polystyrene                           | -          | 17 02 03   |
| Glass                                          | -          | 20 01 02   |
| Residual waste                                 | -          | 20 03 01   |

**Table S2.** Monthly carbon emissions related to the processing of hazardous waste produced during baseline and post-implementation phases in Px labs. Categories I and II were excluded, as their aqueous/inorganic composition contains negligible carbon and they are processed by precipitation rather than incineration.

| Hazardous waste category | Emission factor per category (kg CO <sub>2</sub> /kg waste) | Baseline CO <sub>2</sub> emissions (kg) | Post-implementation CO <sub>2</sub> emissions (kg) |
|--------------------------|-------------------------------------------------------------|-----------------------------------------|----------------------------------------------------|
| Cat. III                 | 2.596                                                       | 475                                     | 420                                                |
| Cat. III.2               | 1.835                                                       | 149                                     | 155                                                |
| Cat. IV                  | 2.569                                                       | 45                                      | 171                                                |
| Cat. VI                  | 1.101                                                       | 103                                     | 181                                                |
| <b>Total</b>             |                                                             | <b>772</b>                              | <b>927</b>                                         |

**Table S3.** Monthly costs per waste category for the processing of hazardous waste produced during baseline and post-implementation phases in Px labs.

| Hazardous waste category | Cost per category (EUR / kg waste) | Baseline costs (EUR) | Post-implementation costs (EUR) |
|--------------------------|------------------------------------|----------------------|---------------------------------|
| Cat. I                   | 1.58 (2024); 1.67 (2025)           | 14                   | 33                              |
| Cat. II                  | 0.99 (2024); 1.05 (2025)           | 26                   | 11                              |
| Cat. III                 | 0.75 (2024); 0.79 (2025)           | 139                  | 129                             |
| Cat. III.2               | 6.00 (2024); 6.02 (2025)           | 489                  | 510                             |
| Cat. IV                  | 0.45 (2024); 0.47 (2025)           | 8                    | 31                              |
| Cat. VI                  | 0.54 (2024); 0.57 (2025)           | 53                   | 93                              |
| <b>Total</b>             |                                    | <b>729</b>           | <b>807</b>                      |

## Supplementary Figures

| A)                             | Baseline | Post-implementation |
|--------------------------------|----------|---------------------|
| Annual consumption (MWh)       | 43.20    | 26.63               |
| CO <sub>2</sub> e emission (t) | 8.21     | 5.06                |
| Electricity costs (EUR)        | 4320     | 2663                |

  

| B)                                    | Baseline | Post-implementation |
|---------------------------------------|----------|---------------------|
| Annual CO <sub>2</sub> e emission (t) |          |                     |
| Refrigerators                         | 1.09     | 0.99                |
| Freezers                              | 1.56     | 1.39                |
| Combined refrigerator-freezers        | 0.41     | 0.27                |
| ULT- freezers                         | 3.13     | 2.08                |
| Stoves                                | 20.06    | 3.08                |

  

| C)                             | Baseline | Post-implementation |
|--------------------------------|----------|---------------------|
| Annual electricity cost (EUR)  |          |                     |
| Refrigerators                  | 575      | 526                 |
| Freezers                       | 824      | 733                 |
| Combined refrigerator-freezers | 216      | 144                 |
| ULT- freezers                  | 1648     | 1099                |
| Stoves                         | 3132     | 2088                |

**Figure S1.** Overview of **A)** annual electricity consumption, costs, and CO<sub>2</sub>e emissions for cold storage equipment and stoves before and after implementation in the Px labs; **B)** annual CO<sub>2</sub>e emissions by equipment category; and **C)** annual electricity costs by equipment category.

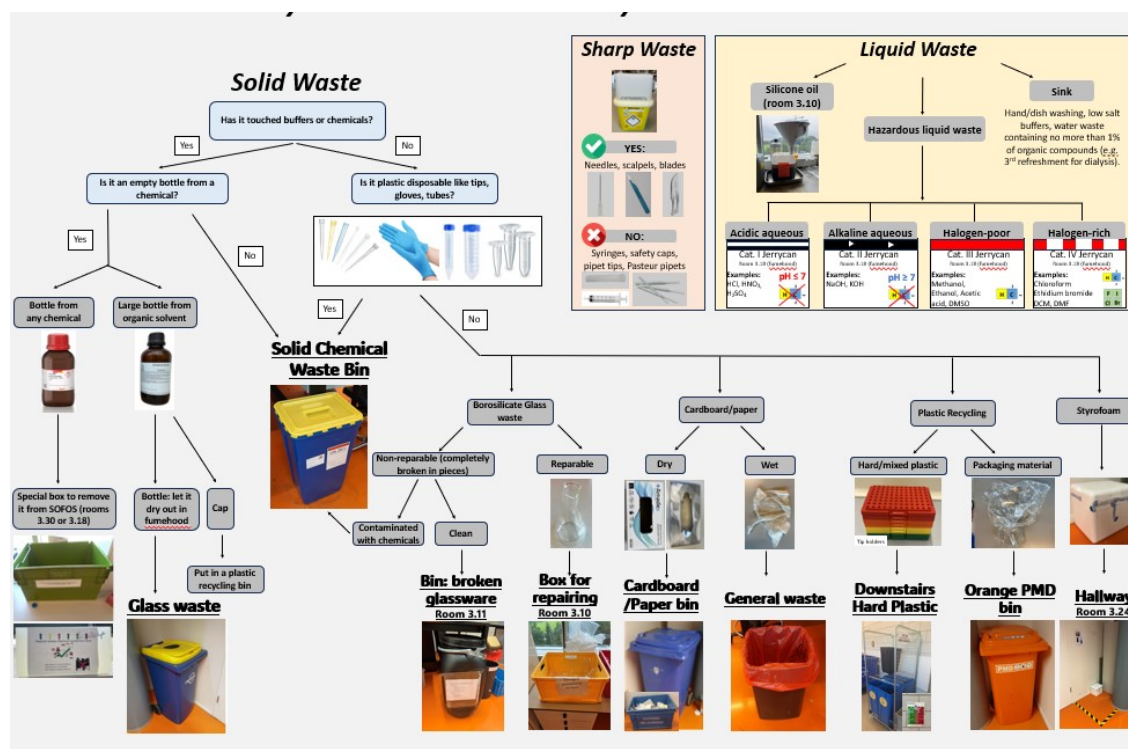

**Figure S2.** Example of decision flow chart for lab waste used in Px labs

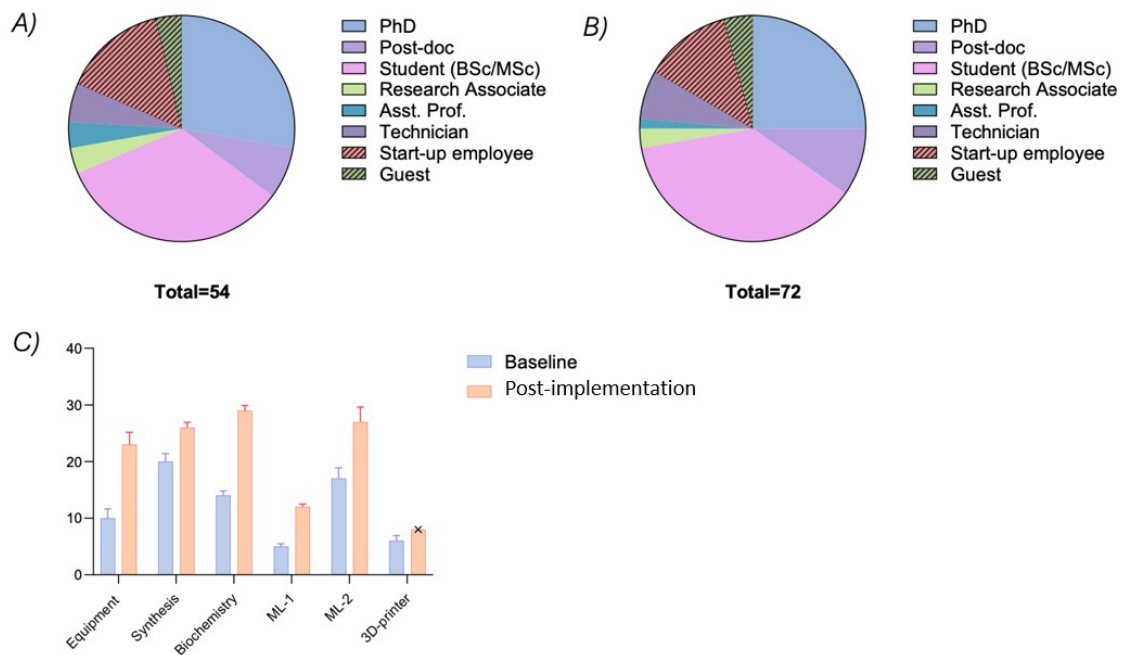

**Figure S3.** Lab-user population demographics in Px labs. **A-B)** Composition of lab users during **(A)** baseline and **(B)** post-implementation phases. Pattern-filled fractions denote external users (i.e., non-Px affiliated). **C)** Monthly average number of lab users during both phases, categorized by lab area. Data are presented as mean  $\pm$  SD ( $N = 3$ ). A cross symbol indicates no variation. Because many individuals worked across multiple areas, aggregated monthly counts exceed the total number of unique users.

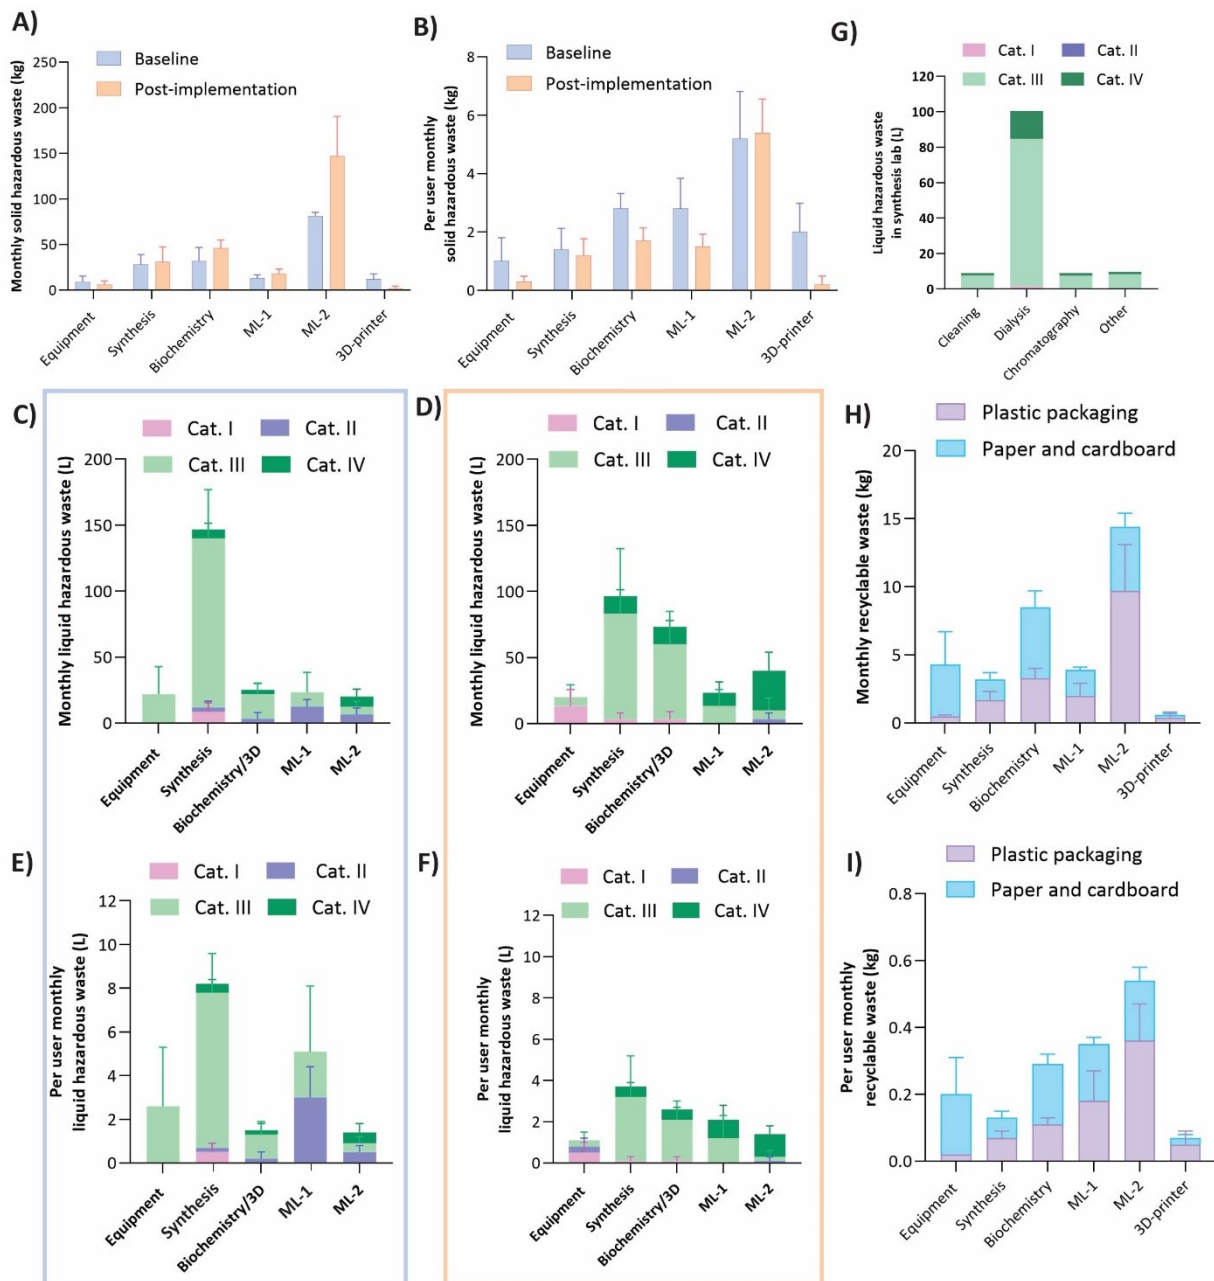

**Figure S4.** Quantification of hazardous and recyclable waste across Px lab areas. Lab hazard classifications are as follows: low biological hazard (ML-1), moderate biological hazard (ML-2), and chemical hazard (synthesis, biochemistry, 3D printing, and equipment labs). Within the chemical hazard category, lab areas are distinguished by experimental work type. Note: the 3D printing and biochemistry labs share a collection point for liquid hazardous waste disposal. **A)** Monthly production of solid hazardous waste pre- and post-intervention. **B)** Per-user monthly production of solid hazardous waste pre- and post-intervention. **C–D)** Monthly production of liquid hazardous waste pre- (C) and post-intervention (D). **E–F)** Per-user monthly production of liquid hazardous waste pre- (E) and post-intervention (F). **G)** Origin of liquid hazardous waste during the post-intervention phase in the synthesis lab. **H)** Monthly production of recyclables post-intervention. **I)** Per-user monthly production of recyclables post-intervention.
